# Supplementary material for: The manipulation of top-down interpretation as one’s symptomatic body reduces the sense of body ownership
Source: Front Psychol. 2024 Dec 23;15:1399218. doi: 10.3389/fpsyg.2024.1399218 (PMC11701977; doi:10.3389/fpsyg.2024.1399218)
Supplement: Supplementary file 1 [file Table_1.XLSX]

## Sheet: Participants information
	Partcipants	age	CDSsum	Group
	1	18	102	0		0 = the group who conducted the neutral self-association condition earlier
	2	22	39	1		1 = the group who conducted the negative self-association condition earlier
	3	20	36	1
	4	20	42	0
	5	23	65	1
	6	23	22	0
	7	21	29	1
	8	24	73	0
	9	22	29	1
	10	21	33	0
	11	23	68	1
	12	19	30	0
	13	19	33	1
	14	20	38	0
	15	22	39	1
	16	20	44	0
	17	21	54	1
	18	21	20	0
	19	24	62	1
	20	26	56	1
	21	22	45	0
	22	25	7	1
	23	22	34	0
	24	21	31	0
	25	24	15	1
	26	25	27	0
	27	24	23	1

## Sheet: Questionnaire (non-association)
		Synchronous (1st)								Synchronous (2nd)								Asynchronous (1st)								Asynchronous (2nd)
	Partcipants	Q1	Q2	Q3	Q4	Q5	Q6	Q7	Q8	Q1	Q2	Q3	Q4	Q5	Q6	Q7	Q8	Q1	Q2	Q3	Q4	Q5	Q6	Q7	Q8	Q1	Q2	Q3	Q4	Q5	Q6	Q7	Q8
	1	3	-3	1	-2	3	-2	0	2	3	-1	2	-2	1	-2	2	-1	-2	-3	-3	2	-2	-3	0	0	2	-3	0	-2	2	-3	2	0	0
	2	2	-3	0	-3	2	-3	0	-3	1	-3	-2	-3	-1	-3	-3	0	-3	-3	-3	-3	-3	-3	-3	-3	-3	-3	-3	-3	-3	-3	-3	-3	1
	3	1	0	1	-2	0	2	1	0	1	-2	-1	-2	1	2	-2	1	-1	-2	-2	-2	-3	2	-2	-3	-3	-2	-2	-2	-3	-2	-3	-2	1
	4	1	-1	0	-1	1	-1	-1	-1	-1	-2	-1	-1	0	-1	-2	0	-1	-1	-1	-1	1	2	-1	1	-1	-2	0	-1	2	1	-1	0	0
	5	3	-1	2	2	3	0	2	2	2	0	3	1	2	0	3	2	2	-3	1	2	1	0	2	2	1	0	2	2	1	0	1	2	1
	6	-3	-3	-3	-3	-2	-3	-3	-3	-3	-3	-3	-3	-3	-3	-3	-3	-3	-3	-3	-1	-3	-1	-3	-3	-3	-3	-3	-1	-3	-1	-3	-3	0
	7	1	-3	-2	-3	-2	-2	-3	-2	-2	-3	-3	-3	-3	-3	-3	-3	0	-3	-2	-3	-3	-3	-3	-3	0	-3	-2	-3	-3	-3	-3	-3	1
	8	0	-1	0	-1	1	-1	0	-1	0	-1	0	-1	0	1	0	-1	-1	-1	-1	-2	-1	0	-1	-2	-1	-1	-1	-1	0	1	-1	0	0
	9	2	-1	-1	-1	1	-2	0	-2	2	-1	1	1	2	-2	-2	-2	0	-2	-2	0	0	-3	-3	-3	-2	-3	-2	-1	-3	-3	-3	-3	1
	10	1	-3	-3	-3	3	1	-3	-1	2	-3	2	3	3	0	-3	-2	-3	-3	-3	-3	-3	1	-3	-3	-1	-3	-3	-3	-3	0	-3	-3	0
	11	1	-2	1	1	1	2	-2	-1	2	-1	-1	2	2	3	-1	3	-1	-3	-1	1	-2	-3	-2	-2	1	-2	2	1	-1	3	-1	2	1
	12	-2	-3	-3	-1	-1	-3	-2	-1	0	-2	0	0	0	-1	-1	-3	-3	-3	-3	-3	-3	-3	-3	-3	-2	-3	-1	-2	-2	-3	-2	-2	0
	13	1	-3	1	-3	-1	2	-3	-3	1	-3	1	-3	1	3	-3	-3	-1	-3	-2	-3	-3	-3	-3	-3	-3	-3	-3	-3	-3	-3	-3	-3	1
	14	2	-3	1	0	2	1	-3	-3	1	-3	1	0	2	0	-3	-3	2	-3	2	2	1	3	-2	-2	-1	-3	-1	-1	-2	-3	-3	-3	0
	15	1	-1	0	-1	2	-2	-1	1	1	-2	2	-1	2	-2	-2	1	-2	-2	-2	-1	1	-1	-2	1	-1	-2	-1	1	-1	1	-2	-1	1
	16	1	-2	1	1	-1	-3	-2	1	3	-2	2	1	1	1	-1	0	2	-3	2	1	-2	-3	-1	1	-1	-3	1	-1	-2	-1	-2	1	0
	17	3	-3	2	2	3	-3	2	-1	2	-3	2	2	2	-2	2	-2	2	-3	1	2	0	-1	2	-1	1	-3	1	1	1	-3	-1	-2	1
	18	-3	-3	-3	-3	-3	1	0	-1	-3	-3	-3	-3	-2	0	-2	0	-3	-3	-3	-3	-1	-2	-3	-3	-2	-3	-3	-3	0	-2	-3	-2	0
	19	-1	-3	-2	0	1	0	-2	-2	-2	-3	-3	-2	-2	-1	-3	-3	-2	-3	-2	-2	-1	-1	-2	-2	-3	-3	-2	-2	-2	-1	-3	-3	1
	20	-2	-3	-3	-2	-2	-3	1	-3	-1	-3	0	-3	-2	-3	-1	-2	-1	-3	-2	-3	1	0	-2	1	-1	-3	-1	1	2	-2	-3	1	1
	21	-2	-3	-2	-3	-2	-3	-2	-3	0	-3	-2	-3	-2	-3	-2	-3	-3	-3	-3	-3	-3	-2	-2	-3	-3	-3	-3	-3	-3	-3	-2	-3	0
	22	-1	-3	-2	-3	-3	0	-3	0	1	-3	1	-3	-1	-1	-3	-1	0	-3	-2	1	-2	-3	-3	1	0	-3	-2	1	1	-3	-3	-1	1
	23	1	-1	0	0	1	3	-1	2	1	-1	1	0	1	3	-1	1	-1	1	-1	2	0	1	-1	1	-1	-1	-1	1	1	1	-1	1	0
	24	-1	-1	0	0	-2	3	0	0	0	-1	1	0	0	3	-1	-1	-1	-1	-2	-2	-2	3	-2	-3	-1	-2	-2	-2	-2	2	-2	-3	0
	25	1	1	1	2	1	0	-1	1	2	1	1	2	2	1	1	2	-1	1	-1	1	-3	-3	-3	0	-2	-3	-3	1	-3	-2	-3	-3	1
	26	3	-3	1	-3	1	-2	-2	-2	3	-1	1	1	1	1	-1	1	3	-3	-2	-2	-2	-2	-2	-1	3	-3	-2	-1	-1	-1	-1	-1	0
	27	2	-1	2	-2	2	1	0	-2	2	-2	2	-1	2	2	-1	1	0	-2	1	-1	-1	1	-1	-1	0	-2	1	-2	-1	1	-2	-1	1
	Q1 (Illusion item)	It felt like the virtual body was my body
	Q2 (Control item)	I felt naked
	Q3 (Control item)	It felt as if my body had turned into a virtual body
	Q4 (Control item)	I felt as if I had two bodies
	Q5 (Illusion item)	It seemed as though the touch I felt was caused by the hand touching the virtual body (= I felt tactile sensations from virtual body)
	Q6 (Illusion item)	I felt as if I was drifting frontwards or backwards
	Q7 (Illusion item)	It felt like I could control the movement of the virtual body I was looking at
	Q8 (Illusion item)	I felt like I couldn't move my own body

## Sheet: Questionnaire (neutlal-self)
		Synchronous (1st)								Synchronous (2nd)								Asynchronous (1st)								Asynchronous (2nd)
	Partcipants	Q1	Q2	Q3	Q4	Q5	Q6	Q7	Q8	Q1	Q2	Q3	Q4	Q5	Q6	Q7	Q8	Q1	Q2	Q3	Q4	Q5	Q6	Q7	Q8	Q1	Q2	Q3	Q4	Q5	Q6	Q7	Q8
	1	3	-1	1	-2	2	0	1	-2	3	1	1	-3	2	0	0	-1	2	-2	1	-2	-1	-2	0	0	1	-2	1	-1	2	0	1	0
	2	1	-3	-2	-3	-3	-3	-3	-3	-1	-3	-3	-3	1	-3	-3	-3	1	-3	1	-3	-3	-3	-3	-3	-2	-3	-2	-2	-3	-2	-3	-3
	3	2	0	1	-2	2	1	1	1	1	-1	1	-1	2	0	1	0	1	0	1	-1	-1	0	-1	-1	1	-1	1	-1	-2	-2	-1	-2
	4	0	-1	0	1	1	-1	-1	-1	1	-1	0	1	2	-1	-1	-1	1	-1	0	-1	1	-1	-1	-1	1	0	0	-1	1	-1	-1	-1
	5	2	1	1	2	1	1	2	0	2	0	1	1	2	0	2	1	1	0	0	2	1	1	0	1	0	0	0	1	1	1	0	1
	6	2	2	2	-3	2	-3	-3	-3	2	2	2	-3	1	-3	-3	-3	1	1	1	-2	-1	-3	-3	-3	2	2	2	-3	-2	-3	-3	-3
	7	-1	-3	-2	-3	-2	-3	-3	-3	-1	-3	-2	-3	-2	-3	-3	-3	-1	-3	-2	-2	-2	-3	-3	-3	0	-3	-1	-2	-2	-3	-3	-3
	8	1	0	0	0	1	1	1	0	1	0	1	0	2	1	1	0	-1	0	0	0	-1	0	-1	0	-1	-1	0	0	-1	0	-1	0
	9	3	2	3	-1	2	-3	-3	0	3	2	3	-2	2	-3	-2	-2	0	-1	-1	1	0	-3	-3	-1	-1	-2	-1	1	-2	-3	-3	-2
	10	1	-3	1	-1	3	-3	-3	-2	2	-3	0	-1	3	-3	-3	-3	0	-3	-3	-3	-1	-2	-3	-2	1	-3	-2	-3	0	-3	-3	-3
	11	1	-2	1	1	2	3	-1	3	-1	-2	1	2	1	3	-2	3	-1	-2	-1	-1	-1	2	-2	1	2	-2	2	2	2	3	-1	2
	12	0	-1	0	1	0	-3	-1	-3	0	-3	1	1	1	-2	1	-2	-2	-2	-2	-1	-3	-3	-2	-3	-2	-3	-2	-1	-3	-3	-1	-3
	13	-2	-3	0	-3	-3	-3	-3	-3	1	-3	-1	-3	-3	-2	-3	-3	0	-3	-2	-3	-3	-3	-3	-3	1	-3	-2	-3	-3	-3	-3	-3
	14	2	-3	-1	1	2	1	-2	-3	1	-3	0	1	2	0	-3	-3	-1	-3	-1	-2	-3	-3	-3	-3	-1	-3	-3	-3	-3	-3	-3	-3
	15	1	-2	1	-1	1	-1	1	-1	1	-2	1	-1	1	-2	-1	-1	0	-2	1	-2	-1	1	-1	-1	1	-2	0	-1	-1	-1	-1	-1
	16	2	0	2	-1	2	1	0	2	2	0	1	1	2	1	1	3	1	0	2	-1	0	-2	0	2	0	-3	1	-1	-1	-2	1	1
	17	2	-1	1	1	2	-2	1	1	2	-1	2	2	3	-1	1	2	2	-1	2	2	2	-1	1	1	2	0	2	2	1	-1	2	2
	18	-1	-3	-1	-3	0	2	-1	-2	-1	-3	-2	-3	0	1	-3	-1	-2	-3	-3	-3	-1	-1	-3	-3	-2	-3	-2	-3	-1	-3	-2	-3
	19	-2	-3	-3	-3	-1	-2	-3	-3	0	-3	-2	0	-1	1	-3	-3	-2	-3	-3	-2	-3	-3	-3	-3	1	-3	-2	1	1	-2	-3	-3
	20	1	-2	0	-3	1	-3	2	-2	1	-2	-3	-3	1	-3	2	-1	1	-1	-3	-3	2	-3	0	-2	1	-3	1	-3	1	-3	1	-2
	21	0	-3	0	1	-2	-1	-2	-2	0	-2	0	1	-2	-1	-2	-3	-1	-3	-2	-1	-3	-2	-3	-3	1	-3	-1	0	-3	0	-2	-2
	22	2	-3	1	-2	2	-3	-3	1	-2	-3	-2	0	1	2	-3	-2	-1	-3	2	1	-2	-3	-3	2	1	-3	0	1	0	-3	-3	1
	23	1	1	1	0	1	1	2	2	2	1	1	0	1	1	1	0	-2	0	-1	1	-1	2	-1	1	-2	0	-1	1	0	1	-2	1
	24	0	-1	0	0	0	2	-2	-2	0	-2	-1	-1	1	2	-3	-2	0	-1	0	0	1	3	-2	-1	0	-2	-1	-1	0	2	-1	-3
	25	-1	-3	0	1	1	-2	-2	-3	2	-3	2	2	2	-1	2	0	-1	-3	-1	1	-1	-3	-3	-3	-1	-3	-1	1	-2	-3	-3	-3
	26	3	1	1	1	1	-1	1	1	3	-1	2	-1	2	-2	1	-1	3	1	1	-2	1	-3	1	-1	3	1	2	2	-1	2	-2	1
	27	2	-2	3	0	3	3	-1	2	3	-1	2	-1	3	3	-1	0	2	-2	2	0	2	3	-2	1	1	-2	3	0	2	3	-1	1

## Sheet: Questionnaire (negative-self)
		Synchronous (1st)								Synchronous (2nd)								Asynchronous (1st)								Asynchronous (2nd)
	Partcipants	Q1	Q2	Q3	Q4	Q5	Q6	Q7	Q8	Q1	Q2	Q3	Q4	Q5	Q6	Q7	Q8	Q1	Q2	Q3	Q4	Q5	Q6	Q7	Q8	Q1	Q2	Q3	Q4	Q5	Q6	Q7	Q8
	1	2	-2	1	-2	2	0	-1	0	2	-1	1	-3	1	0	1	-2	2	-2	0	-1	1	0	-1	-1	2	-1	3	0	1	0	-1	-2
	2	-2	-3	-3	-3	-1	-3	-3	-3	-1	-3	-3	-2	1	-3	-3	-3	-2	-3	-3	-3	-3	-3	-3	-3	-3	-3	-3	-3	-3	-3	-3	-3
	3	1	0	0	-1	1	2	0	-1	2	-1	1	-2	2	1	0	-2	-1	-1	1	-1	-2	1	0	-2	-1	-2	-2	-2	-3	-1	-1	-2
	4	1	-1	1	0	2	-1	1	-1	1	-1	1	-1	2	-1	1	-1	1	-1	1	-1	1	-1	0	-1	1	-1	1	-1	1	-1	1	-1
	5	0	0	-1	1	0	0	0	0	1	0	1	1	0	0	0	1	-1	-1	-1	-1	-2	0	-1	-2	-1	-1	-1	0	-2	0	-1	-1
	6	1	1	1	-3	1	-3	-3	-3	2	2	2	-3	1	-3	-3	-3	1	1	1	-1	-1	-3	-3	-3	1	1	1	-3	-2	-3	-3	-3
	7	-2	-3	-3	-3	-3	-3	-3	-3	-3	-3	-3	-3	-3	-3	-3	-3	-3	-3	-3	-3	-3	-3	-3	-3	-3	-3	-3	-3	-3	-3	-3	-3
	8	1	0	1	0	2	1	1	0	1	0	1	0	2	1	1	0	0	-1	0	1	0	0	-1	0	0	0	1	0	0	1	0	-1
	9	2	0	2	1	3	-3	0	-2	2	1	3	2	2	-2	-3	-3	-2	-3	-2	-2	-2	-3	-3	-3	-2	-3	-2	-2	-2	-3	-3	-3
	10	3	-3	3	2	3	-3	-3	-3	1	-3	0	1	3	-3	-3	-3	1	-3	0	1	-2	-2	-3	-3	-1	-3	0	-1	-2	-3	-3	-3
	11	1	-2	1	1	1	3	-1	3	1	-2	-1	1	1	2	-1	2	1	-2	-1	-1	-1	3	-1	2	-1	-2	2	1	1	3	-1	2
	12	1	-2	1	1	1	-2	1	-2	1	-2	1	1	1	-3	0	2	-1	-3	0	1	-2	-3	-1	-2	0	-3	1	1	-2	-2	0	1
	13	0	-3	0	-3	-3	-3	-3	-3	1	-3	-1	-3	-2	-3	-3	-3	1	-3	0	-3	1	-2	-3	-3	1	-3	1	-3	-2	-1	-3	-3
	14	1	-3	0	0	-1	-3	-3	-3	2	-3	0	-1	1	0	-3	-3	-2	-3	-3	-3	-3	-3	-3	-3	-2	-3	-3	-3	-3	-3	-3	-3
	15	1	-1	1	0	1	-2	1	-1	1	-2	2	1	1	-1	1	-2	1	-2	1	-2	-1	-2	-1	0	-2	-2	-2	-1	-2	-1	-2	-2
	16	2	1	3	-2	2	1	1	1	2	3	2	-1	2	2	-1	1	1	2	1	-3	-2	1	0	2	1	-1	2	-1	-1	2	0	2
	17	2	-2	2	1	3	1	1	2	2	-1	2	2	2	-2	1	2	3	-3	2	-1	2	-2	2	1	2	-2	2	1	3	1	2	2
	18	1	-3	0	-2	2	-1	-1	-3	0	-3	-1	-3	2	-2	-2	-3	-1	-3	-1	-2	1	0	-2	-3	0	-3	-2	-3	1	-2	-3	-3
	19	-1	-3	-1	-2	1	-3	-3	-3	1	-3	0	-2	1	-3	1	-3	1	-3	-2	1	1	-2	-2	-3	0	-3	-3	-1	-1	-3	-3	-3
	20	1	-3	1	1	1	-2	1	-2	0	-3	-1	-2	-2	-3	-3	1	-1	-3	-1	-3	-1	-2	-3	0	0	-3	-2	-2	-2	-2	-2	1
	21	1	-2	-1	0	-1	-1	0	-3	1	-1	1	-1	0	0	-2	-3	1	-3	-2	-1	-3	-1	-2	-3	-1	-3	-1	-2	-2	-2	-2	-2
	22	1	-3	-2	-1	0	-1	-3	-1	1	-3	1	-2	-2	-3	-3	-3	0	-3	2	-2	-2	-2	-3	-1	-2	-3	0	2	1	-2	-3	1
	23	-1	1	-1	2	-1	1	-1	1	1	1	1	0	1	1	1	1	0	1	-1	1	-1	2	-1	1	-1	1	-1	1	-1	2	-1	1
	24	-1	-2	-1	0	0	1	-3	-3	-1	-2	-1	0	0	1	-3	-3	0	0	0	1	1	1	-3	-3	-1	-1	-1	0	1	0	-3	-3
	25	3	0	2	3	3	0	1	0	2	-1	2	0	2	0	0	0	1	-1	1	0	-1	-2	-2	-2	1	-3	-1	1	-2	-3	-1	-2
	26	3	1	1	1	1	-2	-2	-1	2	-2	1	1	1	1	-1	-1	3	1	1	1	1	1	-2	-1	2	1	1	2	1	1	-1	1
	27	2	-2	2	-1	3	3	-1	2	2	-2	2	-2	3	3	-2	2	0	-2	-1	-1	1	2	-1	1	0	-2	1	-1	1	2	-2	1

## Sheet: SCR (non-association)
	Partcipants	Synchronous (1st)	Synchronous (2nd)	Asynchronous (1st)	Asynchronous (2nd)
	1	0.227946	0.0120643	0.0106774	0.00924147
	2	0.284945	0.0317117	0.211507	0.0411419
	3	0.376986	0.106829	0.0394648	0.0670493
	4	0.349728	0.148718	0.181741	0.257227
	5	0.386572	0.337334	0.505914	0.258259
	6	0.0514823	0.00459387	0.0370384	0.00381819
	7	0.109953	0.0428586	0.0962259	0.0606215
	8	0.166115	0.0730319	0.0195532	0.0720542
	9	0.000228182	0.000359773	0.00111896	0.00443082
	10	0.192375	0.107673	0.110872	0.0860495
	11	0.00943241	0.0304267	0.144053	0.0576884
	12	0.536113	0.355078	0.706662	0.309838
	13	0.164979	0.0962029	0.0261041	0.0354637
	14	0.0260364	0.066856	0.0451384	0.00608197
	15	0.10487	0.153545	0.124124	0.118303
	16	0.118009	0.0735618	0.0343022	0.00703669
	17	0.0937829	0.014823	0.0715613	0.00412962
	18	0.140474	0.112683	0.0457188	0.0225075
	19	0.0181809	0.00852108	0.0292716	0.0152821
	20	0.105662	0.0741402	0.0680218	0.0117937
	21	0.297164	0.152953	0.250846	0.223685
	22	0.216961	0.0622839	0.1256	0.0531529
	23	0.229688	0.113449	0.00885116	0.00170533
	24	0.0797899	0.0638312	0.0200206	0.0224654
	25	0.228491	0.0542247	0.110522	0.0639048
	26	0.134171	0.0690236	0.236039	0.100765
	27	0.0020924	0.00250254	0.00537178	0.00497084

## Sheet: SCR (neutlal-self)
	Partcipants	Synchronous (1st)	Synchronous (2nd)	Asynchronous (1st)	Asynchronous (2nd)
	1	0.00323317	0.00255332	0.00692893	0.0123684
	2	0.0102159	0.0175525	0.010256	0.00387858
	3	0.166178	0.0191893	0.00543603	0.0153498
	4	0.154187	0.00523445	0.0134766	0.0294525
	5	0.219454	0.307268	0.143848	0.00642254
	6	0.0581063	0.00317158	0.0178201	0.0021047
	7	0.000310114	0.0225697	0.0837918	0.0309072
	8	0.0199821	0.0108849	0.015751	0.00451501
	9	0.0096679	0.031442	0.00914309	0.00125574
	10	0.102431	0.12468	0.0294409	0.0537093
	11	0.0206534	0.0822085	0.0054226	0.0655808
	12	0.266607	0.0745247	0.0654065	0.0767607
	13	0.000868434	0.00677476	0.0151685	0.00597603
	14	0.00430002	0.0778741	0.0125443	0.0432309
	15	0.054902	0.0126919	0.131784	0.04783
	16	0.0216517	0.0293748	0.0661132	0.00309713
	17	0.000601886	0.00231709	0.00141331	0.00446982
	18	0.0585767	0.0338042	0.0284597	NaN
	19	0.00129956	0.00464497	0.00633246	0.0016799
	20	0.0909168	0.0647679	0.0351918	0.0239131
	21	0.0803557	0.0604472	0.0162102	0.139539
	22	0.0398744	0.0485031	0.0226068	0.0619363
	23	0.00379226	0.0059401	0.00166256	0.00161093
	24	0.123204	0.0172548	0.188492	0.0990014
	25	0.0127851	0.0265979	0.0161719	0.0281531
	26	0.0561843	0.0623853	0.100004	0.0392031
	27	0.0019481	0.00460781	9.57e-05	0.000560667

## Sheet: SCR (negative-self)
	Partcipants	Synchronous (1st)	Synchronous (2nd)	Asynchronous (1st)	Asynchronous (2nd)
	1	0.0418473	0.0115026	0.00166656	0.178205
	2	0.0463491	0.0112324	0.02877	0.00671674
	3	0.0655511	0.0790137	0.00484979	0.00519655
	4	0.00213909	0.00210739	0.00321109	0.0184643
	5	0.0063649	0.0163645	0.146102	0.00588425
	6	0.0057062	0.0126544	0.0711886	0.0015624
	7	0.0416401	0.0286608	0.00962184	0.0465177
	8	0.025526	0.0028405	0.0114537	0.0926073
	9	0.00211057	0.00322885	0.0159969	0.00109768
	10	0.102431	0.12468	0.0294409	0.0537093
	11	0.0473329	0.00167421	0.0212359	0.018204
	12	0.0110904	0.015599	0.0552649	0.140065
	13	0.00310683	0.0524445	0.00497914	0.0431205
	14	0.0104553	0.00821427	0.0626825	0.00844074
	15	0.0101255	0.0646776	0.0360457	0.0373701
	16	0.00511319	0.00558687	0.00658439	0.0402611
	17	0.0131254	0.018352	0.0166623	0.0247091
	18	0.0192348	0.0867122	0.0193244	0.0229748
	19	0.0028264	0.00405077	0.00252006	0.00203407
	20	0.0350273	0.0838852	0.0671086	0.0813096
	21	0.106246	0.184239	0.139315	0.055054
	22	0.00963866	0.0250353	0.0102997	0.00466893
	23	0.00517033	0.00726884	0.00636167	0.0286494
	24	0.009927	0.120298	0.0357466	0.040292
	25	0.0333219	0.0148571	0.088305	0.00615443
	26	0.013647	0.00182604	0.00688095	0.0156654
	27	0.00300475	0.00287709	0.0382629	0.00429995
